# Supplementary material for: Multitask Learning of Signaling and Regulatory Networks with Application to Studying Human Response to Flu
Source: PLoS Comput Biol. 2014 Dec 18;10(12):e1003943. doi: 10.1371/journal.pcbi.1003943 (PMC4270428; doi:10.1371/journal.pcbi.1003943)
Supplement: S42 Table — Extension of Table S23 in S1 Text containing all immune-response related categories for MT-SDREM not present or with p-value ≥0.01 in DE genes for top 1000 genes for H1N1. (XLSX) [file pcbi.1003943.s008.xlsx]

## Sheet: Sheet1
Extension of Table S23 containing all immune-response related categories for MT-SDREM not present or with p-value >= 0.01 in DE genes for top 1000 genes for H1N1
GO Category	MT-SDREM pvalue <=	DE p-value	GO Category Description
GO:0002703	0.001	NA	regulation of leukocyte mediated immunity
GO:0042089	0.001	NA	cytokine biosynthetic process
GO:0046651	0.001	NA	lymphocyte proliferation
GO:0043921	0.001	NA	modulation by host of viral transcription
GO:0043923	0.001	NA	positive regulation by host of viral transcription
GO:0070661	0.001	NA	leukocyte proliferation
GO:0070663	0.001	NA	regulation of leukocyte proliferation
GO:0070665	0.001	NA	positive regulation of leukocyte proliferation
GO:0002902	0.001	NA	regulation of B cell apoptotic process
GO:0034162	0.001	NA	toll-like receptor 9 signaling pathway
GO:0034166	0.001	NA	toll-like receptor 10 signaling pathway
GO:0042098	0.001	NA	T cell proliferation
GO:0050792	0.001	0.01	regulation of viral process
GO:0060070	0.001	NA	canonical Wnt receptor signaling pathway
GO:2000107	0.001	NA	negative regulation of leukocyte apoptotic process
GO:2000106	0.001	NA	regulation of leukocyte apoptotic process
GO:0032727	0.001	NA	positive regulation of interferon-alpha production
GO:0032655	0.001	NA	regulation of interleukin-12 production
GO:0060828	0.001	NA	regulation of canonical Wnt receptor signaling pathway
GO:0050670	0.001	NA	regulation of lymphocyte proliferation
GO:0050671	0.001	NA	positive regulation of lymphocyte proliferation
GO:0032647	0.001	NA	regulation of interferon-alpha production
GO:0038061	0.001	NA	NIK/NF-kappaB cascade
GO:0032648	0.001	NA	regulation of interferon-beta production
GO:0071353	0.001	NA	cellular response to interleukin-4
GO:0034146	0.001	NA	toll-like receptor 5 signaling pathway
GO:0034142	0.001	NA	toll-like receptor 4 signaling pathway
GO:0042345	0.001	NA	regulation of NF-kappaB import into nucleus
GO:0019080	0.001	NA	viral genome expression
GO:0019083	0.001	NA	viral transcription
GO:0033077	0.001	NA	T cell differentiation in thymus
GO:0071346	0.001	NA	cellular response to interferon-gamma
GO:0038123	0.001	NA	toll-like receptor TLR1:TLR2 signaling pathway
GO:0038124	0.001	NA	toll-like receptor TLR6:TLR2 signaling pathway
GO:0050870	0.001	NA	positive regulation of T cell activation
GO:0050871	0.001	NA	positive regulation of B cell activation
GO:0060333	0.001	NA	interferon-gamma-mediated signaling pathway
GO:0060330	0.001	NA	regulation of response to interferon-gamma
GO:0060334	0.001	NA	regulation of interferon-gamma-mediated signaling pathway
GO:0060338	0.001	NA	regulation of type I interferon-mediated signaling pathway
GO:1902107	0.001	NA	positive regulation of leukocyte differentiation
GO:1902106	0.001	NA	negative regulation of leukocyte differentiation
GO:1902105	0.001	NA	regulation of leukocyte differentiation
GO:0048524	0.001	NA	positive regulation of viral process
GO:0031347	0.001	NA	regulation of defense response
GO:0031295	0.001	NA	T cell costimulation
GO:0031294	0.001	NA	lymphocyte costimulation
GO:0051059	0.001	NA	NF-kappaB binding
GO:0032088	0.001	NA	negative regulation of NF-kappaB transcription factor activity
GO:0001782	0.001	NA	B cell homeostasis
GO:0001783	0.001	NA	B cell apoptotic process
GO:0032663	0.001	NA	regulation of interleukin-2 production
GO:0050864	0.001	NA	regulation of B cell activation
GO:0050863	0.001	NA	regulation of T cell activation
GO:0042348	0.001	NA	NF-kappaB import into nucleus
GO:0030111	0.001	NA	regulation of Wnt receptor signaling pathway
GO:0001776	0.001	NA	leukocyte homeostasis
GO:0045580	0.001	NA	regulation of T cell differentiation
GO:0007259	0.001	NA	JAK-STAT cascade
GO:0001959	0.001	NA	regulation of cytokine-mediated signaling pathway
GO:0032479	0.001	0.027	regulation of type I interferon production
GO:0034138	0.001	NA	toll-like receptor 3 signaling pathway
GO:0034134	0.001	NA	toll-like receptor 2 signaling pathway
GO:0042113	0.001	NA	B cell activation
GO:0042110	0.001	NA	T cell activation
GO:0002573	0.001	NA	myeloid leukocyte differentiation
GO:0071706	0.001	NA	tumor necrosis factor superfamily cytokine production
GO:0050852	0.001	NA	T cell receptor signaling pathway
GO:0046632	0.001	NA	alpha-beta T cell differentiation
GO:0046631	0.001	NA	alpha-beta T cell activation
GO:0035666	0.001	NA	TRIF-dependent toll-like receptor signaling pathway
GO:0002367	0.001	NA	cytokine production involved in immune response
GO:0002366	0.001	NA	leukocyte activation involved in immune response
GO:0002218	0.001	NA	activation of innate immune response
GO:0002819	0.001	NA	regulation of adaptive immune response
GO:0045351	0.001	NA	type I interferon biosynthetic process
GO:0051092	0.001	NA	positive regulation of NF-kappaB transcription factor activity
GO:0007249	0.001	NA	I-kappaB kinase/NF-kappaB cascade
GO:0070555	0.001	NA	response to interleukin-1
GO:0042108	0.001	NA	positive regulation of cytokine biosynthetic process
GO:0042107	0.001	NA	cytokine metabolic process
GO:0042100	0.001	NA	B cell proliferation
GO:0045577	0.001	NA	regulation of B cell differentiation
GO:0030225	0.001	NA	macrophage differentiation
GO:0042035	0.001	NA	regulation of cytokine biosynthetic process
GO:0046332	0.001	NA	SMAD binding
GO:0051250	0.001	NA	negative regulation of lymphocyte activation
GO:0030178	0.001	NA	negative regulation of Wnt receptor signaling pathway
GO:0002684	0.001	0.049	positive regulation of immune system process
GO:0002682	0.001	NA	regulation of immune system process
GO:0002683	0.001	NA	negative regulation of immune system process
GO:0060760	0.001	NA	positive regulation of response to cytokine stimulus
GO:0050434	0.001	NA	positive regulation of viral transcription
GO:0002224	0.001	NA	toll-like receptor signaling pathway
GO:0032606	0.001	0.01	type I interferon production
GO:0019048	0.001	0.028	modulation by virus of host morphology or physiology
GO:0002694	0.001	NA	regulation of leukocyte activation
GO:0002696	0.001	NA	positive regulation of leukocyte activation
GO:0030217	0.001	NA	T cell differentiation
GO:0002429	0.001	NA	immune response-activating cell surface receptor signaling pathway
GO:0002761	0.001	NA	regulation of myeloid leukocyte differentiation
GO:0002764	0.001	NA	immune response-regulating signaling pathway
GO:0002768	0.001	NA	immune response-regulating cell surface receptor signaling pathway
GO:0002697	0.001	NA	regulation of immune effector process
GO:0002699	0.001	NA	positive regulation of immune effector process
GO:0060759	0.001	NA	regulation of response to cytokine stimulus
GO:0007260	0.001	NA	tyrosine phosphorylation of STAT protein
GO:0019058	0.001	NA	viral life cycle
GO:0070228	0.001	NA	regulation of lymphocyte apoptotic process
GO:0070227	0.001	NA	lymphocyte apoptotic process
GO:0016055	0.001	NA	Wnt receptor signaling pathway
GO:0002433	0.001	NA	immune response-regulating cell surface receptor signaling pathway involved in phagocytosis
GO:0002756	0.001	NA	MyD88-independent toll-like receptor signaling pathway
GO:0002757	0.001	NA	immune response-activating signal transduction
GO:0002758	0.001	NA	innate immune response-activating signal transduction
GO:0050776	0.001	NA	regulation of immune response
GO:0050778	0.001	NA	positive regulation of immune response
GO:0046782	0.001	NA	regulation of viral transcription
GO:0030098	0.001	NA	lymphocyte differentiation
GO:0002250	0.001	NA	adaptive immune response
GO:0002253	0.001	NA	activation of immune response
GO:0032481	0.001	NA	positive regulation of type I interferon production
GO:0032480	0.001	NA	negative regulation of type I interferon production
GO:0002521	0.001	NA	leukocyte differentiation
GO:0002520	0.001	NA	immune system development
GO:0030888	0.001	NA	regulation of B cell proliferation
GO:0045621	0.001	NA	positive regulation of lymphocyte differentiation
GO:0071887	0.001	NA	leukocyte apoptotic process
GO:0032728	0.001	NA	positive regulation of interferon-beta production
GO:0050900	0.001	NA	leukocyte migration
GO:0045089	0.001	NA	positive regulation of innate immune response
GO:0042509	0.001	NA	regulation of tyrosine phosphorylation of STAT protein
GO:0002260	0.001	NA	lymphocyte homeostasis
GO:0002263	0.001	NA	cell activation involved in immune response
GO:0045321	0.001	NA	leukocyte activation
GO:0045088	0.001	NA	regulation of innate immune response
GO:0051249	0.001	NA	regulation of lymphocyte activation
GO:0032615	0.001	NA	interleukin-12 production
GO:0002460	0.001	NA	adaptive immune response based on somatic recombination of immune receptors built from immunoglobulin superfamily domains
GO:0045619	0.001	NA	regulation of lymphocyte differentiation
GO:0030183	0.001	NA	B cell differentiation
GO:0043124	0.001	NA	negative regulation of I-kappaB kinase/NF-kappaB cascade
GO:0043122	0.001	NA	regulation of I-kappaB kinase/NF-kappaB cascade
GO:0043123	0.001	NA	positive regulation of I-kappaB kinase/NF-kappaB cascade
GO:0060397	0.001	NA	JAK-STAT cascade involved in growth hormone signaling pathway
GO:0002755	0.001	NA	MyD88-dependent toll-like receptor signaling pathway
GO:0051251	0.001	NA	positive regulation of lymphocyte activation
GO:0001816	0.001	0.017	cytokine production
GO:0001818	0.001	NA	negative regulation of cytokine production
GO:0032608	0.001	NA	interferon-beta production
GO:0032607	0.001	NA	interferon-alpha production
GO:0046425	0.001	NA	regulation of JAK-STAT cascade
GO:0034341	0.001	NA	response to interferon-gamma
GO:0050688	0.001	NA	regulation of defense response to virus
GO:0046649	0.001	NA	lymphocyte activation
GO:0032635	0.001	NA	interleukin-6 production
GO:0070670	0.001	NA	response to interleukin-4
GO:0070412	0.001	NA	R-SMAD binding
GO:0070411	0.001	NA	I-SMAD binding
GO:0016032	0.001	0.01	viral process
GO:0002449	0.001	NA	lymphocyte mediated immunity
GO:0002440	0.001	NA	production of molecular mediator of immune response
GO:0002443	0.001	NA	leukocyte mediated immunity
