# Supplementary material for: Multitask Learning of Signaling and Regulatory Networks with Application to Studying Human Response to Flu
Source: PLoS Comput Biol. 2014 Dec 18;10(12):e1003943. doi: 10.1371/journal.pcbi.1003943 (PMC4270428; doi:10.1371/journal.pcbi.1003943)
Supplement: S46 Table — Extension of Table 5 containing all immune-response related categories for MT-SDREM not present or with p-value ≥0.01 in oPossoum TFs for top 50 TFs based on the joint gene ranking list. (XLSX) [file pcbi.1003943.s012.xlsx]

## Sheet: Sheet1
Extension of Table 5 containing all immune-response related categories for MT-SDREM not present or with p-value >= 0.01 in oPossoum TFs for top 50 TFs based on the joint gene ranking list
GO Category	MT-SDREM pvalue <=	DE p-value	GO Category Description
GO:0042035	0.001	NA	regulation of cytokine biosynthetic process
GO:0046332	0.001	NA	SMAD binding
GO:0042089	0.001	NA	cytokine biosynthetic process
GO:0001817	0.001	NA	regulation of cytokine production
GO:0002682	0.001	0.02	regulation of immune system process
GO:0032481	0.001	NA	positive regulation of type I interferon production
GO:0002521	0.001	0.048	leukocyte differentiation
GO:0071346	0.001	NA	cellular response to interferon-gamma
GO:0034142	0.001	0.019	toll-like receptor 4 signaling pathway
GO:0019048	0.001	NA	modulation by virus of host morphology or physiology
GO:0050778	0.001	NA	positive regulation of immune response
GO:0045089	0.001	0.02	positive regulation of innate immune response
GO:0045087	0.001	NA	innate immune response
GO:0060333	0.001	NA	interferon-gamma-mediated signaling pathway
GO:0060337	0.001	NA	type I interferon-mediated signaling pathway
GO:0031349	0.001	NA	positive regulation of defense response
GO:0031347	0.001	0.026	regulation of defense response
GO:0007183	0.001	NA	SMAD protein complex assembly
GO:0019221	0.001	NA	cytokine-mediated signaling pathway
GO:0032728	0.001	NA	positive regulation of interferon-beta production
GO:0006952	0.001	NA	defense response
GO:0006955	0.001	NA	immune response
GO:0002757	0.001	NA	immune response-activating signal transduction
GO:0050776	0.001	NA	regulation of immune response
GO:0001816	0.001	NA	cytokine production
GO:0032479	0.001	NA	regulation of type I interferon production
GO:0001819	0.001	NA	positive regulation of cytokine production
GO:0032608	0.001	NA	interferon-beta production
GO:0032606	0.001	NA	type I interferon production
GO:0002573	0.001	NA	myeloid leukocyte differentiation
GO:0034340	0.001	NA	response to type I interferon
GO:0034341	0.001	NA	response to interferon-gamma
GO:0071141	0.001	NA	SMAD protein complex
GO:0032648	0.001	NA	regulation of interferon-beta production
GO:0070555	0.001	0.048	response to interleukin-1
GO:0070412	0.001	NA	R-SMAD binding
GO:0016032	0.001	NA	viral process
GO:0042107	0.001	NA	cytokine metabolic process
GO:0002253	0.001	NA	activation of immune response
GO:0071357	0.001	NA	cellular response to type I interferon
